# Supplementary material for: Multicentre, randomised clinical trial comparing intravitreal aflibercept monotherapy versus aflibercept combined with reduced-fluence photodynamic therapy (RF-PDT) for the treatment of polypoidal choroidal vasculopathy
Source: HighWire-hosted journal article supplement (doi:10.1136/bmjopen-2021-050252), 2021-07-01
Supplement: bmjopen-2021-050252supp001_data_supplement.pdf [file bmjopen-2021-050252supp001_data_supplement.pdf]

**Supplementary Table 1. Trial registration dataset in accordance with World Health Organization (WHO)**

| Data category                                        | Information <sup>32</sup>                                                                                                                                                                                                                                                                                                                                                                                                   |
|------------------------------------------------------|-----------------------------------------------------------------------------------------------------------------------------------------------------------------------------------------------------------------------------------------------------------------------------------------------------------------------------------------------------------------------------------------------------------------------------|
| <b>Primary registry and trial identifying number</b> | ClinicalTrials.gov Identifier: NCT03941587                                                                                                                                                                                                                                                                                                                                                                                  |
| <b>Date of registration in primary registry</b>      | 24/11/2020                                                                                                                                                                                                                                                                                                                                                                                                                  |
| <b>Secondary identifying numbers</b>                 | Singhealth CIRB Ref No. 2020/2857<br>SERI Ref. No. R1735/58/2020                                                                                                                                                                                                                                                                                                                                                            |
| <b>Source(s) of monetary or material support</b>     | National Medical Research Council Singapore Open Fund Large Collaborative Grant (NMRCLCG17MAY013)                                                                                                                                                                                                                                                                                                                           |
| <b>Primary sponsor</b>                               | Singapore Eye Research Institute, Singapore National Eye Centre                                                                                                                                                                                                                                                                                                                                                             |
| <b>Secondary sponsor(s)</b>                          | Singapore Eye Research Institute,<br>Singapore National Eye Centre                                                                                                                                                                                                                                                                                                                                                          |
| <b>Contact for public queries</b>                    | Gemmy Chui Ming Cheung, FRCOphth<br>Email: <a href="mailto:gemmy.cheung.c.m@singhealth.com.sg">gemmy.cheung.c.m@singhealth.com.sg</a>                                                                                                                                                                                                                                                                                       |
| <b>Contact for scientific queries</b>                | Gemmy Chui Ming Cheung, FRCOphth<br>Email: <a href="mailto:gemmy.cheung.c.m@singhealth.com.sg">gemmy.cheung.c.m@singhealth.com.sg</a>                                                                                                                                                                                                                                                                                       |
| <b>Public title</b>                                  | Comparing intravitreal Aflibercept monotherapy vs Aflibercept combined with RF-PDT in PCV treatment                                                                                                                                                                                                                                                                                                                         |
| <b>Scientific title</b>                              | A multi-centre, randomized clinical trial comparing intravitreal aflibercept monotherapy vs aflibercept combined with reduced fluence photodynamic therapy (RF-PDT) for the treatment of polypoidal choroidal vasculopathy                                                                                                                                                                                                  |
| <b>Countries of recruitment</b>                      | Singapore                                                                                                                                                                                                                                                                                                                                                                                                                   |
| <b>Health condition(s) or problem(s) studied</b>     | Polypoidal Choroidal Vasculopathy                                                                                                                                                                                                                                                                                                                                                                                           |
| <b>Intervention(s)</b>                               | Aflibercept 2mg intravitreal injection (IVA)<br>Monotherapy group<br>Aflibercept 2mg intravitreal injection combined with RF-PDT<br>Combination group                                                                                                                                                                                                                                                                       |
| <b>Key inclusion and exclusion criteria</b>          | Ages eligible for study: ≥50 years<br>Sexes eligible for study: both<br>Accepts healthy volunteers: no<br>Inclusion criteria: Treatment naïve eyes diagnosed with ICGA proven polypoidal choroidal vasculopathy; Best corrected logMAR visual acuity score between 73 to 4 letters (ie 20/32 to 20/320)<br>Exclusion criteria: Known allergy to any component of the study drug. Any other ocular condition other than PCV. |
| <b>Study type</b>                                    | Interventional<br>Multi-centre Randomised, triple masked, open label, two arm, , phase 4 investigator-initiated clinical trial.<br>Primary purpose: treatment<br>Phase IV                                                                                                                                                                                                                                                   |
| <b>Date of first enrolment</b>                       | 11 January 2021                                                                                                                                                                                                                                                                                                                                                                                                             |
| <b>Target sample size</b>                            | 160 subjects                                                                                                                                                                                                                                                                                                                                                                                                                |
| <b>Recruitment status</b>                            | Recruitment started                                                                                                                                                                                                                                                                                                                                                                                                         |
| <b>Primary outcome(s)</b>                            | compare the change in BCVA from baseline to week 52 between the combination group (IVA + RF-PDT) and the IVA monotherapy group.                                                                                                                                                                                                                                                                                             |
| <b>Key secondary outcomes</b>                        | Anatomical outcomes at week 12 and 52 between treatment groups (assessed by multimodal imaging) and Retreatment number between treatment groups                                                                                                                                                                                                                                                                             |

Supplementary Table 2. Polypoidal Choroidal Vasculopathy Grading Sheet (*per study visit*)

| GRADING SHEET |              |                        |               |              |  |          |          |          |          |          |
|---------------|--------------|------------------------|---------------|--------------|--|----------|----------|----------|----------|----------|
| PDT_PCV       | DEMOGRAPHICS |                        |               |              |  | HISTORY  |          |          |          |          |
| STUDY ID      | Age          | Race                   | Sex           | Laterality   |  | Smoking  | HPN      | IHD      | DM       | BCVA     |
|               | (yrs)        | (Chinese/Malay/Indian) | (male/female) | (right/left) |  | (yes/no) | (yes/no) | (yes/no) | (yes/no) | (yes/no) |
| PDT(SNEC)001  |              |                        |               |              |  |          |          |          |          |          |

| PDT_PCV      | FUNDUS COLORED PHOTOS                         |                                              |                         |                           |                             |                      |                      |                       |  |
|--------------|-----------------------------------------------|----------------------------------------------|-------------------------|---------------------------|-----------------------------|----------------------|----------------------|-----------------------|--|
| STUDY ID     | presence of Subretinal orange nodule (yes/no) | Presence of sub-retinal haemorrhage (yes/no) | Total lesion area (mm²) | area of haemorrhage (mm²) | presence of drusen (yes/no) | Soft drusen (yes/no) | Pachydrusen (yes/no) | Pseudodrusen (yes/no) |  |
| PDT(SNEC)001 |                                               |                                              |                         |                           |                             |                      |                      |                       |  |

| PDT_PCV      | ICGA                              |                                               |                             |                            |                              |                               | FA               |                       |                                    |                      |
|--------------|-----------------------------------|-----------------------------------------------|-----------------------------|----------------------------|------------------------------|-------------------------------|------------------|-----------------------|------------------------------------|----------------------|
| STUDY ID     | Presence of Pachyvessels (yes/no) | choroidal vascular hyperpermeability (yes/no) | polypoidal lesions (yes/no) | branching network (yes/no) | branching network area (mm²) | polypoidal lesions area (mm²) | Leakage (yes/no) | Type (classic/occult) | polypoidal lesion leakage (yes/no) | BVN leakage (yes/no) |
| PDT(SNEC)001 |                                   |                                               |                             |                            |                              |                               |                  |                       |                                    |                      |

| PDT_PCV      | SD - OCT                  |                             |                                |                                                |                      |                     |                             |                           |                        |                         |
|--------------|---------------------------|-----------------------------|--------------------------------|------------------------------------------------|----------------------|---------------------|-----------------------------|---------------------------|------------------------|-------------------------|
| STUDY ID     | subretinal fluid (yes/no) | Intraretinal fluid (yes/no) | Hyper-reflective foci (yes/no) | sub-retinal hyper reflective material (yes/no) | PED > 100µm (yes/no) | Serous PED (yes/no) | Fibro-vascular PED (yes/no) | Haemorrhagic PED (yes/no) | Maximum PED width (um) | Maximum PED height (um) |
| PDT(SNEC)001 |                           |                             |                                |                                                |                      |                     |                             |                           |                        |                         |

| PDT_PCV      | SD – OCT (continuation)         |                       |                    |                           |                              |                            |                    |                                     |                                          |  |
|--------------|---------------------------------|-----------------------|--------------------|---------------------------|------------------------------|----------------------------|--------------------|-------------------------------------|------------------------------------------|--|
| STUDY ID     | Foveal PED involvement (yes/no) | Double Layer (yes/no) | Notch PED (yes/no) | Sharp peaked PED (yes/no) | Sub-RPE ring lesion (yes/no) | height of ring lesion (um) | height of PED (um) | Sub foveal choroidal thickness (um) | Attenuation of choriocapillaris (yes/no) |  |
| PDT(SNEC)001 |                                 |                       |                    |                           |                              |                            |                    |                                     |                                          |  |
